# Supplementary material for: Predictors of county-level diabetes-related mortality risks in Florida, USA: a retrospective ecological study
Source: PeerJ. 2025 Jan 16;13:e18537. doi: 10.7717/peerj.18537 (PMC11742252; doi:10.7717/peerj.18537)
Supplement: Supplemental Information 1 [file peerj-13-18537-s001.xlsx]

## Sheet: predictors
FIPS	County_Name	Population_2019	N_death_19	MR_100000	Crude_diab_perc	DSME_perc	Depression	Heavy_drinker	Disability	HTN	Kidney	CHECKUP	CHOLMED	MI_CHD	Stroke	Arthritis	Insurance	See_doc	Personal_doc	Poor_Health	Good_health	BMI_Normal	BMI_Obese	BMI_Overweight	BMI_underweight	Current_smoker	Tobacco_snuff	Diabage	ecig	High_chol	BP_med	Veg_1_more	Fruits_1_more	Highly_active	Active	Insufficiently_active	Inactive	Under_19	Age_20_44	Age_45_64	Age_65_over	Less_25k	R_25k_50k	R_50k	White	Black	Hispanic	Other	Less_HighSchool
12001	ALACHUA	266649	73	27.38	11.1739	64.144	16.7167	6.96066	21.2657	26.6317	2.90728	76.0072	56.1381	3.01096	2.69677	19.4726	86.8446	13.7588	69.2884	11.1922	88.8078	40.1164	29.7745	27.5296	2.57953	11.393	3.15174	48.2274	6.60493	24.7407	77.1814	82.9787	62.9456	34.234	22.0859	19.2661	24.414	23.7	41.5	20.8	13.7	34.8863	21.4205	43.6931	64.1196	17.9194	9.37156	8.58947	6.81039
12003	BAKER	28089	10	35.6	13.8154	45.3972	17.5099	6.98601	34.683	36.5712	3.22854	78.4394	60.9425	6.20047	4.4921	30.0508	78.8127	21.8449	76.8244	25.477	74.523	26.6097	36.4448	34.2756	2.66147	29.6838	11.0779	48.8044	2.22607	32.8265	82.4079	87.5906	52.4682	24.3533	13.1061	22.2062	40.3271	25.9	33.3	27.2	13.7	34.2611	21.4527	44.2862	80.5792	9.68289	6.71799	3.02331	16.1626
12005	BAY	179900	65	36.13	11.6211	51.7421	20.0384	5.51567	33.368	36.8207	4.3354	72.5779	62.0929	4.73057	4.51422	28.8684	84.0163	16.4299	69.9069	20.9421	79.0579	30.4106	29.8533	36.4206	3.31465	22.1258	4.37436	46.9644	9.1129	28.3469	74.8706	84.7626	57.2318	36.782	14.6765	15.883	32.6573	23.3	32.4	27.1	17	33.5714	29.2599	37.1687	78.861	10.3383	5.64293	5.15713	14.7464
12007	BRADFORD	28455	10	35.14	12.3276	41.7527	20.5281	6.51377	35.0494	44.1421	5.07782	78.1383	61.0953	5.36339	3.7296	27.9522	80.6172	18.2989	73.8081	23.9861	76.0139	30.6586	35.8376	30.3903	3.11414	27.1249	8.30552	46.4483	4.81015	30.1791	78.8362	86.7423	59.8599	32.2617	14.1787	12.6049	40.9547	21.6	34.6	26	17.8	38.9414	27.317	33.7471	74.8333	18.6843	4.02861	2.45296	17.5537
12009	BREVARD	593372	153	25.78	12.7833	56.8571	21.6893	7.18593	30.1602	37.5336	3.56512	78.761	57.2033	4.85814	6.11794	31.4185	84.6911	15.8546	78.3972	21.0198	78.9802	31.5974	30.738	36.6343	1.03038	16.3328	3.05457	49.5981	6.71303	34.7551	80.2051	81.7477	68.1866	33.7955	16.3187	18.0823	31.8035	20.4	26.8	29.3	23.4	30.2086	29.0085	40.7829	77.3285	8.79241	9.2569	4.62216	10.3294
12011	BROWARD	1927014	430	22.31	11.4583	49.9068	13.0399	5.62814	29.7984	33.6857	3.03122	80.8154	53.4032	3.43825	4.76312	20.3852	82.2658	18.546	72.7643	18.794	81.206	33.3119	27.1288	37.8865	1.67278	12.5511	2.30139	48.5351	4.29137	33.5343	80.9558	77.9807	69.4536	31.3224	16.8483	22.2819	29.5472	23.4	32.6	27.5	16.3	33.6681	25.0684	41.2635	38.2507	26.1315	29.4672	6.15054	12.9252
12013	CALHOUN	14982	7	46.72	13.2454	41.5496	19.2304	9.54212	41.0321	35.5389	2.72932	69.2924	65.4564	6.35146	4.76124	27.292	81.7701	17.8499	79.3042	26.3932	73.6068	27.4421	34.9691	35.2735	2.31881	20.1932	9.19308	49.5757	6.54223	34.7255	80.608	77.7811	56.8025	33.7782	10.9321	13.9294	41.3689	21.4	33	26.3	19.2	36.5591	34.0637	29.3772	77.0992	13.9044	5.94503	3.05352	21.4666
12015	CHARLOTTE	182298	86	47.18	14.8777	60.6687	18.7515	9.67655	36.4655	41.451	3.41001	81.9112	64.4869	7.79472	5.31502	38.0052	88.1349	14.162	80.9144	21.1155	78.8845	31.1359	27.3671	39.4869	2.0094	15.3916	2.22636	53.5162	5.6631	41.0769	80.6463	83.0443	60.8495	43.18	15.1857	15.6277	26.0055	13.7	18.7	27.9	39.6	26.3575	29.5028	44.1397	86.0255	5.11106	6.09214	2.77195	8.596
12017	CITRUS	147735	81	54.83	16.7004	39.8105	19.1637	7.48564	42.6849	46.9814	4.72627	80.684	68.0841	7.897	4.7548	40.2071	87.8662	18.7485	78.3701	22.0808	77.9192	30.231	31.1547	36.3012	2.31227	19.8003	3.1456	52.4314	7.11008	43.7038	85.1171	82.5121	61.7127	40.0017	14.1206	13.5264	32.3526	16.4	19.9	27.4	36.3	34.271	31.0286	34.7004	89.534	2.70215	4.87033	2.89432	11.8978
12019	CLAY	217109	57	26.25	13.6254	44.3089	19.102	7.69124	34.2606	38.4529	3.86421	76.0814	56.5291	5.35057	5.38288	27.936	86.3831	13.6098	75.8844	21.7311	78.2689	29.2234	34.6056	34.3221	1.84823	22.234	2.97297	50.0405	6.3317	30.5296	78.5839	82.8926	58.9456	34.455	17.6884	16.4	31.4566	25.9	31.1	27.7	15.4	22.8058	28.7269	48.4666	75.3718	9.93382	9.11868	5.57575	10.4631
12021	COLLIER	377700	71	18.8	10.4751	59.9537	11.4568	8.5889	23.7608	35.2002	2.71022	77.1527	64.1569	4.42993	3.07148	26.0908	83.9641	13.681	73.9409	17.2845	82.7155	34.685	23.1036	40.7519	1.45954	11.6934	1.70975	49.696	3.3522	32.4954	77.5386	77.4754	64.1787	37.8036	15.3058	14.3742	32.5169	19.2	24.1	25.1	31.6	25.909	25.8983	48.1923	68.4713	6.52839	23.3708	1.62956	13.1184
12023	COLUMBIA	70614	30	42.48	16.484	38.4228	22.7161	6.35776	40.494	44.0324	3.55618	75.8936	65.8279	6.12569	6.06655	31.2832	83.1828	15.6097	74.8366	25.06	74.94	23.7872	35.1561	38.2254	2.83136	23.8952	7.43875	50.1017	7.27715	34.3578	75.7046	83.6529	55.6883	30.847	13.0443	14.928	41.1807	24.4	30.7	26.6	18.3	39.2223	28.2707	32.5069	74.0697	17.3382	3.97142	4.62244	17.974
12027	DESOTO	35718	27	75.59	14.754	64.8241	14.5561	8.49661	31.1629	34.8744	4.61621	73.7682	65.2041	4.57508	4.87165	27.8746	68.5533	18.0676	63.6605	23.5633	76.4367	27.0351	30.5917	40.7379	1.63504	18.335	11.6409	48.2779	5.2063	33.7873	79.7001	78.1438	56.8288	31.4584	14.391	16.1672	37.9833	22.3	32.4	23.6	21.7	40.0117	32.9616	27.0309	58.4196	11.9464	27.226	2.41097	30.7269
12029	DIXIE	16516	9	54.49	12.9116	48.9378	16.3979	7.26075	45.8614	42.8045	5.2391	76.0216	58.2613	6.53248	5.46606	38.7728	80.6543	21.4327	75.6498	32.5023	67.4977	26.8827	34.1762	35.7645	3.18184	29.4898	13.5237	44.6389	6.3606	34.6681	80.6093	81.2483	59.8884	31.1793	12.2294	14.8124	41.778	19.3	28.5	29.2	22.7	47.4269	33.1852	19.3879	83.2782	7.22909	6.63914	2.84746	25.0306
12031	DUVAL	971842	246	25.31	12.8505	62.3687	23.917	6.44649	31.4041	37.5653	3.61458	77.3052	59.6026	6.34417	3.85094	26.5254	85.8376	17.4412	76.2206	22.3177	77.6823	29.0489	32.9876	35.4698	2.49371	16.3584	2.65293	46.8366	5.61433	30.3068	79.8783	83.6777	60.5531	34.6542	13.833	16.9766	34.536	25	35.9	25.5	13.7	29.7636	20.6154	49.621	56.555	27.1868	8.91143	7.34671	10.3796
12033	ESCAMBIA	322901	92	28.49	12.8248	75.3011	19.9452	8.1392	33.3154	36.2065	2.30891	77.3152	63.2898	2.82791	5.74569	29.6185	80.0029	15.6344	71.6834	23.1927	76.8073	29.8108	31.6058	36.3216	2.26231	16.5998	4.98982	47.4063	6.91525	27.6967	78.8305	80.7517	61.0791	30.8607	18.1897	18.7968	32.1528	24.4	33.7	25.2	16.6	33.0899	29.7088	37.2019	67.7374	20.4103	5.57772	6.27459	12.2077
12035	FLAGLER	110636	45	40.67	12.0386	62.538	17.594	6.68238	32.97	39.617	3.87361	81.209	62.0529	6.88175	4.4043	28.736	88.0517	15.8641	77.8563	18.9143	81.0857	34.3747	28.5979	35.8227	1.20471	19.9584	1.92772	52.6709	5.07384	35.6024	79.3415	83.9876	64.4937	45.9213	12.8062	14.2582	27.0162	19.5	22.8	27.8	30	24.951	31.4553	43.5951	77.1261	8.36808	9.86982	4.63605	8.82027
12037	FRANKLIN	12017	2	16.64	9.85417	53.1444	13.5445	11.5187	35.9476	40.6419	3.20312	74.1591	62.7557	4.56316	4.05202	25.5556	78.361	17.4165	72.3926	22.3643	77.6357	27.5505	34.6421	34.587	3.22675	24.1975	7.70876	50.7322	4.0986	35.0374	79.5897	83.6859	55.1244	33.8343	9.18235	16.3434	40.6319	17.8	31	28.6	22.7	41.7803	29.6539	28.5658	77.6017	8.75587	8.96541	4.67643	19.8598
12039	GADSDEN	47926	21	43.82	19.8807	56.0388	18.2285	2.34337	39.9767	46.9761	4.42387	78.5775	65.6829	4.98606	3.54206	26.5436	75.0506	21.7942	80.1745	29.5266	70.4734	26.6446	48.062	24.6103	0.684184	15.1408	2.11296	49.2751	6.48636	29.3486	73.9269	74.2397	64.027	28.4962	14.86	13.7679	42.8802	23.9	31.3	27.4	17.3	42.699	34.7591	22.5419	35.5578	54.4165	8.65693	1.36977	25.5475
12041	GILCHRIST	17682	9	50.9	19.0302	48.1358	23.7749	2.96104	44.5309	40.2682	4.19248	63.1857	59.9707	8.03712	5.45818	36.915	79.0655	17.3484	67.7068	33.125	66.875	19.4254	41.6371	36.0723	2.86273	19.2775	9.19483	48.5651	5.8582	30.7687	74.9908	93.3305	55.1928	32.1067	19.7547	9.43442	38.7093	24.8	28	26.9	20.3	40.3531	38.3635	21.2834	88.8756	1.10306	8.36261	1.65967	15.7695
12043	GLADES	13098	5	38.17	20.7912	49.4637	16.3281	11.6792	36.8042	44.3359	4.04093	72.4138	69.3396	5.63476	3.51469	34.6455	81.5385	21.19	64.979	24.9446	75.0554	20.5885	35.0166	43.4551	0.946125	15.3095	5.44921	51.4737	1.99702	34.5997	83.2638	80.2616	56.2014	31.8712	15.8304	11.2245	41.0774	19.6	27.5	26	26.9	34.8746	40.2038	24.9314	63.5274	14.9341	19.5495	1.99093	19.0225
12045	GULF	16507	5	30.29	15.3193	65.955	20.4633	6.83508	40.098	40.8186	3.56064	72.2505	64.8918	7.69902	5.08271	28.7452	78.4314	18.8509	68.8535	26.833	73.167	30.0301	29.6821	38.4372	1.85741	23.9759	7.40938	44.5385	7.97564	30.5547	81.1581	81.0935	50.7238	34.3739	13.077	12.5829	39.9542	18	32	29.2	20.7	37.8873	26.8774	35.2353	73.376	19.4021	3.56905	3.64562	17.5281
12047	HAMILTON	14787	6	40.58	16.2947	32.0427	14.213	5.82583	35.2184	46.3839	4.58406	76.45	65.2812	8.97033	6.80902	25.2566	80.5726	14.9664	71.6451	28.1455	71.8545	25.459	43.7414	29.8519	0.942933	20.1949	8.37453	48.8659	3.02373	30.0027	81.5315	77.1461	54.5497	34.4202	13.7493	10.6548	41.1719	21.4	33.8	27.7	17	41.1968	28.6591	30.144	56.5805	33.497	6.28718	3.63188	26.4744
12049	HARDEE	27311	16	58.58	16.4589	41.8328	11.4642	6.17198	31.3868	27.5953	4.30709	73.4203	60.1626	5.53482	3.40257	23.4995	70.0489	18.5832	66.1457	28.3529	71.6471	25.5741	35.1621	36.5469	2.71391	20.7355	7.50864	47.4203	4.76346	30.6265	82.8822	76.0993	58.9044	25.1026	10.5384	13.1276	51.2314	28.8	32.5	22.9	15.8	42.6497	34.365	22.9794	53.5123	3.61468	41.9606	0.91689	33.2953
12051	HENDRY	40089	11	27.44	14.0944	29.5601	10.3957	4.91746	32.4454	35.1923	3.67498	72.7419	62.082	3.3196	4.94133	18.332	69.3968	15.4694	57.6092	27.0649	72.9351	25.2353	43.4047	29.6594	1.69953	18.0647	4.52014	42.3941	4.41713	23.9966	77.4527	66.5795	60.872	25.3745	10.9124	14.7574	48.9557	29.5	33.3	24	13.1	53.3864	22.1695	24.4441	37.7019	11.3041	48.4744	2.52194	38.3715
12053	HERNANDO	189661	109	57.47	14.5769	53.4925	21.6011	4.2275	37.2825	36.1718	4.46913	76.1618	67.067	6.96736	4.70699	35.8549	82.5622	16.478	74.7913	24.8943	75.1057	29.9038	30.7148	37.6112	1.77012	21.4995	1.92647	47.9947	7.31054	36.6768	84.4863	82.64	64.0372	39.0078	10.7643	13.5556	36.6724	20.4	25.1	27	27.5	33.7457	30.9304	35.324	80.9938	4.65078	11.4471	2.90897	13.236
12055	HIGHLANDS	103391	43	41.59	18.0087	44.0575	18.0322	5.73699	40.7277	42.5864	4.55402	78.6602	65.5251	7.63082	5.86417	32.0873	83.4142	13.4556	77.7789	25.927	74.073	31.7763	29.1051	36.5489	2.56958	16.5464	3.5793	49.2446	3.12809	34.5621	83.2069	82.4649	65.2458	33.4392	14.225	14.4192	37.9165	19.1	22.7	23.1	35.2	36.6069	32.1089	31.2842	72.2345	8.44169	16.5952	2.72859	20.3366
12057	HILLSBOROUGH	1445243	305	21.1	10.8694	53.8909	16.7662	6.66026	27.1281	33.3058	3.58037	77.2366	49.1916	4.11585	3.34185	23.6925	84.4808	15.5505	68.647	18.4267	81.5733	29.4395	30.1821	38.6007	1.77772	15.9698	3.41588	45.9308	5.71897	30.7294	78.1191	75.1051	61.6582	28.6862	18.8491	18.8863	33.5784	25	35.5	25.6	13.9	27.6482	22.6817	49.6701	52.5607	14.9914	26.15	6.29798	13.9809
12059	HOLMES	20218	11	54.41	18.4344	51.0123	19.8762	5.12613	38.9776	42.7975	6.25211	76.7068	64.2949	6.33692	5.94022	34.3724	80.9912	17.9985	76.9062	27.767	72.233	21.1168	43.6312	32.5324	2.72583	23.9854	8.89005	45.5614	6.90783	30.4291	82.5762	84.8578	49.3311	26.5529	11.6117	15.4198	46.4156	21.5	30.8	27.6	19.8	41.9022	29.7992	28.2986	85.8356	5.13771	4.67535	4.35133	18.4347
12061	INDIAN RIVER	155308	56	36.06	11.761	48.389	15.8425	11.1927	33.4394	37.6836	3.62855	77.3261	54.9029	6.56522	4.62274	30.3246	83.3346	13.246	74.9465	18.593	81.407	37.9547	25.6035	34.099	2.34269	15.9385	1.89366	52.8332	4.21053	35.2599	75.6595	86.6553	68.1942	45.3392	11.1438	13.3817	30.1353	18.3	22.5	26.9	32.3	25.2458	28.8007	45.9534	79.3603	7.48677	10.2803	2.87333	11.6461
12063	JACKSON	50325	22	43.72	18.754	46.8807	18.4539	7.3569	39.8681	44.609	3.98619	73.756	67.5901	5.97701	4.9387	30.9631	83.3101	16.8538	76.218	25.7555	74.2445	23.7334	40.2524	33.8911	2.12359	26.0425	10.429	50.1323	5.81214	30.0466	77.1317	87.6858	55.8076	29.9326	10.509	20.0674	39.491	20.9	33.1	26.8	19.3	40.7225	29.6403	29.6341	65.7291	26.9284	5.00223	2.33877	17.9703
12065	JEFFERSON	14842	8	53.9	14.3767	61.5028	10.3218	8.95171	33.7985	42.0745	2.4613	72.3249	65.083	5.83749	5.7738	29.2666	85.5254	16.0325	78.1013	20.0735	79.9265	29.6099	29.0682	35.924	5.39423	17.0609	4.27505	51.8903	4.66363	38.2567	85.0572	86.1065	55.7807	33.1389	14.2545	17.3168	35.302	17.7	29.1	30.2	22.9	31.875	31.1042	37.0208	61.633	30.6702	3.72163	3.96914	17.8924
12067	LAFAYETTE	8613	1	11.61	10.3694	50.7267	18.2609	7.9495	35.6939	36.1436	3.57822	70.1403	67.1693	6.61743	5.62962	27.2044	79.0035	16.4989	79.748	24.6927	75.3073	20.9494	38.5449	39.2845	1.22614	26.4328	9.65193	47.7484	5.11248	32.5162	81.8381	86.798	52.7228	34.9398	9.09142	11.3918	44.5783	24.1	36.8	25.4	13.8	38.9519	33.0705	27.9777	71.5292	12.8458	13.7453	1.87318	19.5052
12069	LAKE	354537	170	47.95	12.5708	54.2424	17.8397	7.56734	35.9457	37.577	3.14303	78.9948	57.5926	5.47839	4.09294	33.7972	85.1583	13.6119	73.1663	21.2757	78.7243	32.3324	30.3413	34.0691	3.25715	15.9011	2.22755	48.8419	6.27411	30.7606	77.6635	82.5592	60.6662	37.6624	16.4254	13.3537	32.5585	21.2	26.4	25.8	26.5	27.0779	29.2646	43.6575	73.5638	9.1641	13.4833	3.78842	16.972
12071	LEE	734630	226	30.76	10.1518	63.4628	16.8681	8.9303	28.2411	35.9057	3.3454	80.1935	62.178	6.25033	3.35933	29.5739	87.5489	12.0526	76.3807	20.0512	79.9488	35.5954	24.8327	37.1521	2.4198	14.2417	1.91193	49.1376	6.64901	33.511	78.8849	82.8981	64.4188	38.1127	16.8004	17.0662	28.0203	19.9	26.1	26	28.1	25.2631	25.8008	48.9362	72.0349	6.45549	17.9845	3.5252	12.6554
12073	LEON	296717	64	21.57	6.35335	63.9397	16.1687	7.45719	20.9846	25.2995	2.08124	73.4917	53.7007	2.54944	2.23819	18.1557	90.1421	11.9469	77.142	8.59206	91.4079	38.6108	27.512	30.8324	3.04474	14.2614	2.56574	45.9657	7.50455	23.5589	72.5439	79.4877	63.9252	25.8874	22.6418	26.1976	25.2732	24.5	41.4	21.3	12.9	32.5671	22.8905	44.5424	58.7424	29.82	6.01599	5.42163	9.1719
12075	LEVY	41354	11	26.6	14.9633	59.5244	23.5511	6.18677	42.7764	43.2852	5.74692	76.6631	68.7316	5.12718	3.71194	35.4709	79.9818	19.8248	74.0617	28.8873	71.1127	22.9631	35.7602	37.8468	3.42995	22.5733	5.78448	49.2287	5.84319	31.31	76.7959	78.0044	54.5378	32.0359	13.2422	9.4092	45.3127	21.6	25.8	28.3	24.1	43.4869	31.1075	25.4056	82.0876	4.39344	9.52467	3.99432	18.9333
12077	LIBERTY	9167	2	21.82	9.65564	49.4451	17.1106	6.3897	36.6172	35.7122	1.9422	76.8685	53.0159	6.42228	4.11215	23.9228	83.2397	11.8049	77.5378	27.6985	72.3015	28.0713	34.237	36.7777	0.924048	22.4373	12.9247	50.3235	8.21675	27.9214	69.8183	77.9293	57.1464	31.5206	18.3006	15.1824	34.995	20	35.9	28.8	15.3	40.39	28.1894	31.4206	69.8043	17.7317	8.63552	3.83691	14.2283
12079	MADISON	19533	9	46.08	13.702	53.6139	15.8042	3.84473	36.1145	44.6213	3.27224	81.7296	69.6683	4.37154	6.4138	31.7948	84.0444	14.4294	82.4897	23.4127	76.5873	23.6922	44.4976	30.4513	1.35859	16.8709	10.4222	49.4672	4.3527	35.4969	81.2804	79.0546	57.6228	27.1944	15.6902	20.8798	36.2254	21.7	30.8	27.3	20.1	38.5117	30.6248	30.8635	56.3856	36.9819	4.90104	1.7293	15.2421
12081	MANATEE	388729	111	28.55	11.7035	46.7598	16.0132	8.37414	26.9815	34.4956	4.46732	77.7941	58.2118	6.79337	2.18308	27.1118	86.2864	11.6669	74.3856	17.7621	82.2379	36.4835	25.8462	35.8563	1.81398	13.2571	3.11986	48.3767	4.63681	32.7793	82.9709	83.7782	66.2805	38.4218	18.0357	15.9581	27.5845	20.5	25.6	26.9	27	24.7468	25.6701	49.583	75.8939	7.01663	13.2873	3.80248	12.1682
12083	MARION	360053	200	55.55	16.805	41.4537	18.704	6.31776	38.0491	46.1113	4.86228	83.4004	62.2034	8.14677	6.26814	35.5472	84.853	19.0722	78.2521	26.433	73.567	31.0121	34.9983	31.7802	2.20938	18.2635	2.90201	50.2726	3.30468	34.3633	81.1859	78.8249	57.9623	37.5841	10.5539	14.3482	37.5132	20.5	25.5	25.4	28.6	38.0891	28.3362	33.5746	74.1595	11.3397	11.0576	3.44321	14.4688
12085	MARTIN	158006	44	27.85	10.3424	71.6341	14.065	10.4599	31.5519	33.629	3.84229	79.2238	67.2569	6.44193	4.27626	28.9276	84.6578	11.9039	77.5991	15.4242	84.5758	43.9338	18.1883	36.4393	1.44034	14.454	2.40158	51.5913	4.41174	31.7498	89.2495	89.7256	68.4152	40.1672	13.6365	17.5042	28.6921	18.5	22.8	28.3	30.6	24.5047	21.6803	53.815	82.2945	2.96824	11.7978	2.93949	10.7072
12086	MIAMI-DADE	2830500	702	24.8	9.79942	37.6676	14.2264	5.44116	28.4101	28.93	3.19292	79.1493	56.8409	4.53971	2.58026	17.7952	83.0744	20.0714	67.3989	22.5921	77.4079	35.9271	27.3058	34.614	2.15298	11.9788	1.34097	47.9648	3.76131	27.2792	79.4058	69.8768	64.0243	29.997	18.3551	18.9359	32.7121	22.8	34.4	26.9	16	39.2946	25.0181	35.6872	13.0718	14.5261	69.7905	2.61166	13.893
12087	MONROE	73253	14	19.11	7.27864	38.6893	14.4967	12.2149	33.0958	30.0716	2.06049	72.4882	55.8779	4.79453	3.96119	28.0491	79.0545	14.2072	67.613	16.8265	83.1735	34.4171	24.704	39.7391	1.13978	17.5519	1.44509	52.5069	5.20122	27.8291	85.5434	82.1313	71.1834	43.2082	17.5281	14.0687	25.195	16.8	29.3	31.7	22.1	24.2942	25.0452	50.6625	69.6446	5.59334	22.4925	2.2681	9.67394
12089	NASSAU	85135	11	12.92	12.5872	59.9912	20.8076	8.9313	36.4883	40.9956	2.63666	78.9948	66.1404	5.5289	5.0158	30.7109	84.6234	13.8633	78.092	19.9103	80.0897	28.6248	32.2363	36.3833	2.75553	22.3692	5.00677	49.1585	3.65169	36.3943	74.4062	85.8749	62.2719	38.5102	18.755	12.9124	29.8253	21.9	27.8	28.9	21.5	23.9486	27.0687	48.9808	88.1603	5.23181	4.14264	2.4652	12.6667
12091	OKALOOSA	201104	61	30.33	11.8834	76.597	16.2624	8.6285	27.9859	34.5262	4.08805	70.62	57.4348	3.44343	3.40437	24.6611	82.842	15.1982	68.2047	16.7909	83.2091	30.6413	26.4264	40.627	2.30462	19.3379	3.44463	50.7798	8.68512	25.1547	73.8158	84.9996	61.9545	38.0588	15.3023	18.3239	28.3161	24.2	35.1	25.1	15.7	27.1211	24.8573	48.0216	76.4876	9.26787	7.69351	6.55167	10.2107
12093	OKEECHOBEE	41347	12	29.02	13.9987	39.0696	16.3949	4.85093	34.4873	34.4329	2.22938	73.2779	69.5955	5.74939	5.92604	24.8255	76.4567	15.0895	64.2905	26.5892	73.4108	24.6469	35.8142	38.2022	1.33727	20.1136	4.14576	43.8138	3.96155	29.4756	79.5794	85.3014	64.9026	29.0902	14.2375	15.4182	41.2591	23.9	30.2	26.1	19.8	37.3461	28.3548	34.299	66.7089	7.37791	22.2695	3.64673	25.406
12095	ORANGE	1389297	251	18.07	9.45862	53.0879	17.5091	6.89005	25.9189	30.1079	2.46296	75.2225	47.6457	2.95957	3.00797	18.4369	80.8129	15.1786	66.9889	20.1475	79.8525	31.7463	31.2694	34.6876	2.29668	11.6478	2.61892	47.1894	6.08984	30.2256	67.3216	73.4606	59.8781	29.2449	16.9691	21.7472	32.0388	25.1	38.8	24.3	11.6	35.2366	24.3536	40.4097	42.4913	18.8668	30.4264	8.21545	12.8174
12097	OSCEOLA	368678	77	20.89	15.955	39.3603	15.355	3.1238	30.1688	37.4195	4.15041	75.0094	68.3871	6.38435	4.4173	23.5783	81.3308	20.3412	64.8979	23.5624	76.4376	23.7	32.5251	42.7646	1.01027	12.8108	1.23595	46.7021	6.16181	34.9948	75.1831	79.0149	67.925	33.6217	18.5761	16.5935	31.2088	27.4	35.7	24.2	13	38.6895	30.8165	30.494	33.3776	9.05632	52.7048	4.8609	19.9072
12099	PALM BEACH	1458576	351	24.06	10.5388	69.7388	12.4101	6.69787	31.7394	33.8466	2.62091	79.8166	57.8387	4.99461	3.22706	23.1389	85.5593	15.8297	75.441	18.1357	81.8643	37.8325	24.2525	35.2378	2.6773	11.032	1.3881	47.4595	5.35865	32.7551	79.7643	84.6292	72.7726	41.9245	13.8346	17.042	27.1988	21.4	28.8	26.1	23.6	25.3633	26.022	48.6147	58.5861	16.6715	20.4623	4.27995	12.1958
12101	PASCO	527174	237	44.96	11.7418	44.7443	19.7374	6.97629	35.2607	38.4876	3.51805	76.9551	60.9513	6.78473	5.39905	32.3045	86.2998	17.5487	72.432	22.675	77.325	38.2224	26.1388	33.6405	1.99827	21.6081	3.79971	50.6353	6.65169	33.876	75.9623	78.0474	61.325	32.0612	19.5756	18.9829	29.3803	22.4	28.2	26.8	22.5	31.6859	23.7844	44.5297	77.8908	3.54699	13.0131	5.54888	16.4473
12103	PINELLAS	979558	322	32.87	10.6627	54.6268	17.1932	10.1667	29.704	39.4175	3.1036	79.9242	61.3549	4.85546	4.3022	27.8856	86.8158	15.1383	76.0977	18.2395	81.7605	33.6625	28.3752	35.4153	2.54702	19.6956	1.47206	53.0429	8.88374	34.367	74.2897	86.8986	67.461	43.341	18.7243	15.2653	22.6692	18.2	28	29.6	24.3	27.2905	25.4491	47.2605	77.3957	9.21234	9.00107	4.39098	8.76476
12105	POLK	688770	238	34.55	15.4311	58.4248	17.45	4.7046	40.5389	42.1527	5.55345	75.6069	54.7313	6.66196	3.67615	28.6678	81.7244	19.8476	72.2217	24.7851	75.2149	27.0373	36.3332	35.0325	1.59706	17.7702	4.86695	43.2726	6.94816	35.7042	76.0744	79.0949	58.2459	32.6675	14.3026	17.9904	35.0392	24.6	30.8	24.4	20.2	36.1626	27.5203	36.3171	63.8293	13.3342	19.2335	3.60309	20.4336
12107	PUTNAM	73012	51	69.85	18.1127	48.0096	23.4606	6.83776	44.5407	44.3006	4.97411	75.824	59.0821	6.96545	4.99555	34.6778	81.1859	21.934	70.63	26.9142	73.0858	28.9755	39.4868	30.2315	1.30673	26.8864	3.20399	49.4321	5.85728	36.343	77.4666	80.0756	53.8435	31.1341	15.6087	16.0402	37.2142	23.3	26.7	27.4	22.7	41.687	29.5244	28.7886	75.5696	14.0769	8.15201	2.20154	22.0886
12109	SANTA ROSA	249734	47	18.82	8.65856	60.0509	19.4271	9.16653	28.8522	35.6039	2.76217	77.3311	58.1548	4.28293	4.12154	24.8681	87.081	14.5469	74.2302	14.2761	85.7239	38.3633	23.9723	34.2993	3.36509	14.5687	2.87939	48.7885	5.67634	31.7563	73.7436	90.6167	64.9815	42.3853	15.3004	17.1631	25.1521	24.1	27.4	28.6	19.7	20.2985	20.759	58.9424	84.6174	5.2592	6.35155	3.77183	5.38334
12111	SARASOTA	309073	98	31.71	12.2253	51.3133	17.8568	5.46428	36.4956	35.4699	3.32325	74.285	59.9118	5.83477	6.237	28.3617	81.6321	17.1941	70.3936	22.2267	77.7733	28.3017	32.3643	37.7172	1.61683	16.1217	1.49228	51.0375	5.09301	36.1501	76.2877	80.9457	65.7444	36.457	15.3985	15.5851	32.5595	22.1	27.7	26.4	23.8	31.2349	28.7437	40.0209	62.2546	17.5613	16.175	4.00909	12.2476
12113	SEMINOLE	179875	105	58.37	10.307	70.3797	21.6861	8.43001	30.6365	33.9586	2.73325	73.3078	56.8053	4.3377	2.94657	30.4586	85.7326	14.2091	78.1362	19.346	80.654	29.5508	32.2002	36.1715	2.07829	21.0934	3.68406	51.1104	6.516	31.1318	76.2851	84.0179	59.8185	33.6966	17.0439	17.8832	31.3762	24.3	32.3	27.6	15.8	23.6647	28.9843	47.3518	83.3115	4.98136	5.09661	6.61051	11.6707
12115	ST JOHNS	426977	41	9.6	10.1656	56.8168	18.7251	9.74172	30.1266	36.0758	2.85247	78.0817	64.3672	4.25116	3.74587	28.4649	88.4643	10.8341	80.2834	14.4181	85.5819	36.4966	22.117	39.8022	1.58387	16.433	1.98949	52.4816	6.23255	29.4411	86.8954	85.4547	68.1303	40.4274	20.7799	12.107	26.6852	16	21	27	36	23.4025	28.0941	48.5034	86.0117	3.85589	7.59521	2.53718	7.44758
12117	ST LUCIE	472775	121	25.59	9.52786	55.8667	19.4944	7.60109	29.5178	33.1943	2.01736	76.0863	59.2432	2.86196	2.28497	24.4057	84.9367	13.317	70.6589	16.8875	83.1125	36.7025	22.7001	37.5928	3.00461	11.1574	2.51888	52.4313	4.86038	27.9499	77.1637	84.8867	69.1052	37.6052	17.4423	19.4344	25.5181	23.4	34.4	27.1	15.2	26.1194	24.7345	49.1462	62.8838	10.8919	20.0626	6.16169	8.4402
12119	SUMTER	130642	71	54.35	18.4538	60.325	13.8358	9.54882	29.9814	45.8672	4.49034	89.0842	70.5212	7.61891	6.64805	40.036	90.5457	9.49041	86.0314	17.1069	82.8931	27.3847	27.5483	43.826	1.24112	11.7363	3.01713	53.5095	2.60835	40.9544	86.4899	92.8662	66.8654	54.5961	12.1002	9.92589	23.3763	8.3	13.9	21.2	56.7	23.1511	20.5505	56.2984	88.085	4.84477	5.3243	1.74511	10.1897
12121	SUWANNEE	45482	13	28.58	15.6152	41.7301	19.8854	7.7061	40.9048	39.7218	7.68953	72.1737	65.3681	8.19094	7.00549	35.5308	80.952	19.2946	71.4353	29.7474	70.2526	22.7924	37.6424	37.6393	1.92479	25.3998	7.12794	46.6986	5.41368	31.2325	78.243	78.6194	49.107	30.3492	12.3574	15.6929	41.5962	23.6	28.8	27.1	20.5	41.1117	25.3209	33.5639	76.8133	11.9613	7.54633	3.67911	19.985
12123	TAYLOR	22652	16	70.63	15.4556	41.4104	20.9644	5.26705	38.4721	42.6361	4.41502	76.0697	57.6859	6.10577	6.41421	35.1515	81.1077	19.1789	72.364	28.93	71.07	28.527	37.583	30.5442	3.34907	23.8238	7.11275	50.046	4.43492	32.1013	78.7402	82.5552	58.3169	32.6646	13.0678	17.3354	36.9322	22	32.2	26	19.7	40.9171	30.7889	28.294	72.384	20.2627	2.77468	4.58006	16.8793
12125	UNION	15985	6	37.54	11.6105	70.8329	24.7044	1.2653	36.0101	40.6968	6.84374	69.6239	57.7579	5.71598	3.21998	24.5239	84.0722	21.363	73.0558	24.718	75.282	24.8942	38.8702	35.9247	0.308784	32.4084	7.38108	46.4109	13.1478	31.7389	78.7696	86.2465	50.7326	31.0287	27.53	14.8035	26.6379	20.8	37.2	27	15	42.458	21.1751	36.3669	66.5176	22.5349	5.52055	5.42688	12.366
12127	VOLUSIA	539563	237	43.92	14.8226	65.2477	18.8079	7.79711	34.6472	40.9933	4.21327	75.7788	57.878	5.70989	3.52834	32.3603	84.9123	17.5653	76.2905	21.8261	78.1739	30.7951	35.5353	30.7329	2.93692	18.4943	2.30394	50.2061	4.573	36.981	74.0558	84.9112	64.4021	38.3804	17.4043	17.1703	27.045	20.1	27.9	27.8	24.2	33.1669	29.0867	37.7467	75.0749	9.35677	11.9805	3.58754	14.8704
12129	WAKULLA	32418	7	21.59	13.4037	71.8951	16.6275	11.3107	31.4889	34.4743	1.71594	75.7846	53.9653	4.36354	1.22703	26.8142	83.9359	13.155	76.9113	19.5249	80.4751	21.3183	37.8567	36.6695	4.15469	21.4286	9.3026	47.9083	7.04022	31.2655	85.423	80.6067	49.6965	28.2164	19.7971	15.7157	36.2652	23.1	32.8	29.6	14.6	36.1775	20.6566	43.1659	78.9302	9.96817	7.4606	3.64017	16.9455
12131	WALTON	70352	16	22.74	13.3795	61.8639	19.3007	9.38489	38.5263	42.2941	4.76412	69.5955	60.8592	5.25226	5.31154	32.9421	78.3769	21.0411	67.8181	27.4213	72.5787	26.8143	34.341	37.8764	0.967824	28.5858	8.40158	47.1344	8.67099	30.873	77.1353	81.6704	60.8649	38.5704	10.9941	16.4411	33.9945	22.2	29	29.4	19.5	33.7224	25.6537	40.6239	86.0321	5.26456	6.2058	2.49579	17.7942
12133	WASHINGTON	25347	14	55.23	15.0634	51.758	18.1581	5.6698	38.9336	42.1085	3.53597	74.3288	62.5731	7.2699	6.23751	34.0926	80.9407	19.5652	75.605	26.1078	73.8922	29.7167	38.6204	30.6087	1.05925	22.2111	8.67782	48.3944	6.51376	31.3586	77.3487	80.8047	49.5455	33.9809	13.7696	13.1646	39.0934	21.7	33	28	17.2	39.9468	30.0629	29.9903	77.9055	15.6219	3.35994	3.11388	17.8691
[truncated: 16 more columns]

## Sheet: Description
	FIPS	FIPS code of county
	County_Name	Name of county
	Population_2019	Population of county in 2019
	N_death_19	Number of deaths in county in 2019
	MR_100000	Mortality risks per 100,000 persosn
	Crude_diab_perc	Percentage of having diabetes
	DSME_perc	Percentage of attending DSME
	Depression	Percentage of being depressed
	Heavy_drinker	Percentage of heavy drinkers
	Disability	Percentaget hat have any disability
	HTN	Percentage of having hypertesion
	Kidney	Percentage of having kidney disease
	CHECKUP	Percentage that have regular checkup
	CHOLMED	Percentage that take medications for high cholesterol
	MI_CHD	Percentage of having myocardial infarction or heart disease
	Stroke	Percentage of having stroke
	Arthritis	Percentage of arthritis
	Insurance	Percentage that have insurance covergae
	See_doc	Percentage that could not see a doctor for medical cost
	Personal_doc	Percentage that have a personal doctor
	Poor_Health	Percentage of having overall poor health
	Good_health	Percentage of having overall good health
	BMI_Normal	Percentage of having normal weight
	BMI_Obese	Percentage of being obese
	BMI_Overweight	Percentage of being overweight
	BMI_underweight	Percentage of having less than normal weight
	Current_smoker	Percentage of current smokers
	Tobacco_snuff	Percentage of current tobacco or snuff user
	Diabage	Average age of diabetes diagnosis
	ecig	Percentage of current ecig users
	High_chol	Percentage that have high cholesterol
	BP_med	Percentage that take medications for hypertension
	Veg_1_more	Percentage that eat vegetables >=once a day
	Fruits_1_more	Percentage that eat fruits >=once a day
	Highly_active	Percentage of being highly active
	Active	Percentage of being active
	Insufficiently_active	Percentage of being insufficiently active
	Inactive	Percentage of being inactive
	Under_19	Percentage with age less than 19 years
	Age_20_44	Percentage with age 20 to 44 years
	Age_45_64	Percentage with age 45 to 64 years
	Age_65_over	Percentage with age equal or greater than 65 years
	Less_25k	Percentage that income less than 25k per year
	R_25k_50k	Percentage that income 25k to 50k per year
	R_50k	Percentage that income more than 50k per year
	White	Percentage of being White, non-Hispanic
	Black	Percentage of being Black, non-Hispanic
	Hispanic	Percentage of Hispanic
	Other	Percentage of being other, non-Hispanic
	Less_HighSchool	Percentage of having less than high school education
	Highschool	Percentage of having high school education
	Somecoll	Percentage of having some college education
	College	Percentage of having college education
	Married	Percentage of being married
	Div_wid_sep	Percentage of being divorced/widowed/separated
	Nevermarr_unmarried	Percentage of being never married or unmarried couple
	Male	Percentage of male
	Female	Percentage of female
	R_rural	Percentage of rural population
	R_house_nove	Percentage of houses with no vehicle
	AVG_PM	Average parts per milion of CO2(air quality)
	R_Lim_Access_Healthy_Food	Percentage that lack access of healthy food
	R_Food_Insecurity	Percentage with food insecurity
	R_Acces_exercise	Percentagethat have access of exercise opportunity
	R_Unemployed	Percentage of being unemployed
	PCPhysician_100k	Number of primary care physician per 100k population
